# Supplementary material for: Establishment of H3K9me3-dependent heterochromatin during embryogenesis in Drosophila miranda
Source: eLife. 2021 Jun 15;10:e55612. doi: 10.7554/eLife.55612 (PMC8285105; doi:10.7554/eLife.55612)
Supplement: Supplementary file 1. [file elife-55612-supp1.xlsx]

## Sheet: Sheet1
Supplementary file 1. ChIP-seq sample information and mapping statistics
Sample info						ChIP library statistics							Input library statistics
ChIP library ID	Input library ID	Stage	Sex	Antibody		Auto. coverage	D.mir reads	D.mel reads	Unmapped	Ambiguous	Total		Auto. coverage	D.mir reads	D.mel reads	Unmapped	Ambiguous	Total
DBCC022C1	DBCC022C2	3	male	H3K9me3		0.01616	251614	1468241	3101816	6907	4828578		4.32764	8640649	12233580	1501444	35134	22410807
DBCC022C3	DBCC022C4	3	male	H3K9me3		0.28942	1192313	14139346	16181422	46916	31559997		1.29468	2671779	9959805	912900	23627	13568111
DBCC039A1	DBCC039B1	3	male	H3K9me3		1.43928	7344274	25459273	44137810	201467	77142824		7.58588	16029697	30721885	2715236	198852	49665670
DBCC039A2	DBCC039B2	3	female	H3K9me3		0.92584	6398665	21917807	54603538	175279	83095289		5.3916	11698136	40065465	1699998	259818	53723417
DBCC039A3	DBCC039B3	3	female	H3K9me3		0.9963	7822756	33123731	38972468	291973	80210928		14.198	29405515	34221779	1433488	231498	65292280
DBCC039A7	DBCC039B7	3	female	H3K9me3		0.78144	7788732	34905265	47839630	292496	90826123		9.69604	19785110	33518647	2452642	265347	56021746
DBCC039A8	DBCC039B8	3	male	H3K9me3		3.4033	7997871	13796167	12847536	115192	34756766		5.14988	11096358	35348539	1501968	270988	48217853
DBCC039A9	DBCC039B9	3	male	H3K9me3		0.81984	8382312	28441634	63126544	212615	100163105		7.33872	15913260	37202635	2424002	287046	55826943
DBCC026A5	DBCC026A6	early 4	female	H3K9me3		1.00848	2581279	6319932	3032300	14671	11948182		3.42118	6583731	5057569	61050	8842	11711192
DBCC026A7	DBCC026A8	early 4	female	H3K9me3		4.26216	10156787	25905040	9777180	79186	45918193		4.26144	8164630	5405407	120580	8578	13699195
DBCC026A9	DBCC026A10	early 4	female	H3K9me3		6.14934	13514733	22709633	16309516	77350	52611232		3.82154	7540365	5964353	158454	10271	13673443
DBCC026A11	DBCC026A12	early 4	male	H3K9me3		0.83088	2564358	6876204	3058562	33441	12532565		3.25322	6422461	5819050	490848	9895	12742254
DBCC031A	DBCC031B	early 4	male	H3K9me3		6.03872	20879189	10655306	7371876	53159	38959530		19.0714	37583435	6727813	606632	39848	44957728
DBCC031C	DBCC031D	early 4	female	H3K9me3		3.87616	14266244	16473210	9546592	68719	40354765		18.8204	36075450	14889262	720084	94184	51778980
DBCC031E	DBCC031F	early 4	female	H3K9me3		6.97224	21890206	7022801	12846070	27514	41786591		16.4734	31436239	5233582	694422	15573	37379816
DBCC031G	DBCC031H	early 4	female	H3K9me3		5.78546	15382632	15818530	4111010	62751	35374923		22.1216	42030312	9168674	5036596	46467	56282049
DBCC031I	DBCC031J	early 4	female	H3K9me3		5.78464	14828404	11086392	8819980	47283	34782059		22.4008	42763473	15322007	4839022	104287	63028789
DBCC031K	DBCC031L	early 4	male	H3K9me3		4.80248	12694053	22048628	12120278	91678	46954637		12.7483	25499931	16043411	1932150	93275	43568767
DBCC039A4	DBCC039B4	early 4	female	H3K9me3		6.9383	21408315	29211288	23305004	300682	74225289		15.8725	31785554	24935762	837996	196918	57756230
DBCC039A10	DBCC039B10	early 4	female	H3K9me3		1.19896	8902572	26683650	48830280	208771	84625273		16.0036	31695091	22119031	1135016	190996	55140134
DBCC021A	DBCC021I	late 4	male	H3K9me3		3.10848	11014972	75855418	13755322	294022	100919734		7.6377	15201401	23829569	1043874	74907	40149751
DBCC021C	DBCC021J	late 4	male	H3K9me3		5.82292	20798205	34816874	23541864	116187	79273130		7.294	14385503	6267994	786718	18161	21458376
DBCC021E	DBCC021K	late 4	female	H3K9me3		3.52944	11326719	47699273	15879518	209026	75114536		4.87246	9487098	9725589	535540	34492	19782719
DBCC021G	DBCC021L	late 4	female	H3K9me3		1.11366	5407594	15338899	5687748	66156	26500397		6.35666	12706260	9963266	521340	46663	23237529
DBCC026B1	DBCC026B2	late 4	male	H3K9me3		0.6706	45684469	52674449	17612924	127839	116099681		3.80778	7396314	5766030	91956	9535	13263835
DBCC026B3	DBCC026B4	late 4	male	H3K9me3		0.643	1925685	12402584	3267990	34413	17630672		3.76062	7398673	7817421	169964	12062	15398120
DBCC026B5	DBCC026B6	late 4	female	H3K9me3		0.74474	2149767	5727091	8012224	15720	15904802		3.91604	7508024	7799762	228028	13695	15549509
DBCC026B7	DBCC026B8	late 4	aneuploid	H3K9me3		0.69614	2500672	10542670	2429650	30155	15503147		3.0091	6720665	5884154	97260	9866	12711945
DBCC026B9	DBCC026B10	late 4	female	H3K9me3		4.34222	12812717	33573391	10425002	140219	56951329		4.38194	8653025	6150330	76118	13171	14892644
DBCC026B11	DBCC026B12	late 4	female	H3K9me3		1.11072	3049071	9612077	5039476	27869	17728493		5.61404	10828459	7251185	145442	12616	18237702
DBCC026B13	DBCC026B14	late 4	female	H3K9me3		0.292	1147276	6165471	3408858	17465	10739070		3.9152	7471860	4529100	83508	9200	12093668
DBCC026B15	DBCC026B16	late 4	aneuploid	H3K9me3		0.62104	1705550	5128762	5330376	15090	12179778		5.9233	10030600	6036507	113334	9632	16190073
DBCC032A	DBCC032B	late 4	female	H3K9me3		6.82412	24278241	18832463	2074884	73779	45259367		22.9309	44296303	9424727	198196	49029	53968255
DBCC032C	DBCC032D	late 4	male	H3K9me3		5.04746	14564859	18858127	10358794	71966	43853746		20.1104	39460486	8393819	319958	31399	48205662
DBCC032E	DBCC032F	late 4	male	H3K9me3		7.7828	21727843	20930510	5017982	89594	47765929		21.247	42043708	6541766	211532	49076	48846082
DBCC032G	DBCC032H	late 4	male	H3K9me3		3.94572	11529051	18505195	4329920	78953	34443119		17.7081	35219581	13333423	794224	66731	49413959
DBCC032I	DBCC032J	late 4	male	H3K9me3		1.77504	6552786	25391147	11321288	102464	43367685		16.6438	33105971	15216286	564442	54857	48941556
DBCC032L	DBCC032K	late 4	male	H3K9me3		4.1206	14894135	24903259	4564564	98336	44460294		15.902	31235131	11981614	638118	37417	43892280
DBCC032M	DBCC032N	late 4	female	H3K9me3		6.24312	20854481	25216539	3113082	105589	49289691		20.8506	40072872	6212135	903572	36584	47225163
DBCC032O	DBCC032P	late 4	male	H3K9me3		7.53738	23231432	10350805	7737798	41773	41361808		20.105	39346395	4311514	226350	29833	43914092
DBCC020B	DBCC020C	5a	female	H3K9me3		0.88614	2919606	1227739	986190	20182	5153717		13.6663	27293743	6256849	412984	62247	34025823
DBCC020E	DBCC020F	5a	aneuploid	H3K9me3		2.07276	16858375	2345930	722790	11106	19938201		15.7349	36742577	5161753	237684	22613	42164627
DBCC021M	DBCC021O	5a	female	H3K9me3		1.3923	7464708	3188600	17816034	14325	28483667		24.2762	46381459	11026231	658876	43374	58109940
DBCC021P	DBCC021R	5a	male	H3K9me3		8.38662	49142200	25066333	14152590	84198	88445321		18.1215	35391669	9011268	915060	38110	45356107
DBCC021S	DBCC021U	5a	male	H3K9me3		8.52154	49650654	12743110	23149272	71110	85614146		15.1683	28786391	2415658	591930	19364	31813343
DBCC021V	DBCC021X	5a	male	H3K9me3		0.5542	3456468	2061242	13875422	10968	19404100		7.56342	14896140	3441206	920020	15391	19272757
DBCC026C1	DBCC026C2	5a	female	H3K9me3		4.26746	72514042	63934015	33284556	171584	169904197		3.47822	6711672	3977164	1189146	8530	11886512
DBCC026C3	DBCC026C4	5a	male	H3K9me3		0.6638	2980499	2647375	4453980	8650	10090504		4.2599	8256788	2350553	37262	5479	10650082
DBCC026C5	DBCC026C6	5a	female	H3K9me3		4.99856	14168896	15596225	9459436	49103	39273660		3.8982	7498341	2882711	162084	6357	10549493
DBCC026C7	DBCC026C8	5a	aneuploid	H3K9me3		1.75414	4499084	2946048	2301756	7514	9754402		5.13686	7710551	2134341	34250	4146	9883288
DBCC026C9	DBCC026C10	5a	female	H3K9me3		6.73954	20311226	22653072	16020946	67537	59052781		4.0916	7674514	3111385	37488	6219	10829606
DBCC026C11	DBCC026C12	5a	male	H3K9me3		0.4371	2499096	3143842	3614476	10147	9267561		4.99316	9580287	3126624	51408	7487	12765806
DBCC026C13	DBCC026C14	5a	female	H3K9me3		3.73764	10626338	23418353	10825132	65436	44935259		5.75058	11104289	4835298	71322	9052	16019961
DBCC026C15	DBCC026C16	5a	male	H3K9me3		1.24716	4012660	4045499	6523612	10462	14592233		7.71926	15276406	4081532	86750	8903	19453591
DBCC029A	DBCC029B	5a	female	H3K9me3		6.34064	22710144	10899453	2314340	27425	35951362		26.8075	50465519	5959602	321582	25628	56772331
DBCC029C	DBCC029D	5a	female	H3K9me3		5.9877	18461206	14457047	1809834	37113	34765200		16.8984	32616299	10276612	252858	36334	43182103
DBCC029E	DBCC029F	5a	female	H3K9me3		5.40894	17608712	13202924	4714484	34697	35560817		22.5796	41889533	4092185	122678	14672	46119068
DBCC029G	DBCC029H	5a	male	H3K9me3		4.41994	15945218	14247656	1016590	36326	31245790		19.3169	37375570	14180326	228216	51338	51835450
DBCC029I	DBCC029J	5a	female	H3K9me3		2.49934	7440203	23133464	2510526	81973	33166166		8.72746	16833820	13810683	373588	39381	31057472
DBCC029K	DBCC029L	5a	female	H3K9me3		4.29316	11171338	20349744	2337802	69813	33928697		12.5844	24467677	11873530	462092	28949	36832248
DBCC029M	DBCC029N	5a	female	H3K9me3		5.82432	12947717	19135450	8338842	55690	40477699		14.8791	28891077	11116579	7223508	31441	47262605
DBCC029O	DBCC029P	5a	female	H3K9me3		2.44874	7219956	25904898	3936088	83117	37144059		15.3012	29137286	23358620	256518	47806	52800230
DBCC039A5	DBCC039B5	5a	male	H3K9me3		4.89244	25864720	31099903	24799136	283984	82047743		10.7149	22232515	12574341	665952	111001	35583809
DBCC039A11	DBCC039B11	5a	male	H3K9me3		4.27238	25350306	14397767	17407210	119709	57274992		19.1714	37793644	11241483	607804	125884	49768815
DBCC018B	DBCC018C	7	female	H3K9me3		7.9544	40510580	10623292	931386	73048	52138306		18.8294	36287284	10755355	192278	134625	47369542
DBCC018E	DBCC018F	7	male	H3K9me3		7.85584	36640193	17348764	2739570	102098	56830625		18.187	35709069	17421810	390256	97777	53618912
DBCC018H	DBCC018I	7	female	H3K9me3		4.98288	35651644	12105377	1290704	43212	49090937		18.478	35285593	9834435	242002	110844	45472874
DBCC018K	DBCC018L	7	male	H3K9me3		5.71518	35822616	7828537	517102	34842	44203097		19.4181	37851778	8668411	242192	54151	46816532
DBCC019G3	DBCC019A4	7	female	H3K9me3		4.40894	36060546	27428320	8150668	162382	71801916		10.7511	20180576	5582574	328580	14990	26106720
DBCC019B4	DBCC019D4	7	female	H3K9me3		4.23032	23109622	4467994	1470744	32658	29081018		10.0498	18726318	4251512	346882	10917	23335629
DBCC039A6	DBCC039B6	7	male	H3K9me3		4.9977	50903615	6409791	9545994	82483	66941883		23.5776	46249093	8145935	528098	95307	55018433
DBCC039A12	DBCC039B12	7	male	H3K9me3		6.50964	44710957	5667170	4611616	66640	55056383		24.8003	49743377	7905388	596306	107270	58352341
DBCC042A1	DBCC042A2	3		H3		2.10172	5900559	7157765	19132990	22759	32214073		3.21498	6922354	17610987	1197768	61885	25792994
DBCC042A3	DBCC042A4	3		H3		3.69541	8319422	5070991	12912512	13576	26316501		15.2937	30822960	18085567	1556012	77312	50541851
DBCC042A5	DBCC042A6	3		H3		1.4668	3926266	2200982	22527436	4459	28659143		17.9672	35305949	14502842	3044230	64798	52917819
DBCC042C1	DBCC042C2	3		H3K4me1		5.97459	13317748	11825761	10633028	20173	35796710		16.0181	32793971	28223049	1750390	106593	62874003
DBCC042C3	DBCC042C4	3		H3K4me1		1.03818	4477209	3695245	27732538	18481	35923473		15.8572	31198978	24767062	2438436	89610	58494086
DBCC042C5	DBCC042C6	3		H3K4me1		0.47075	3018396	1883162	25938356	14074	30853988		15.2705	31551460	18133021	2055498	66126	51806105
DBCC042B1	DBCC042B2	3		H4K16ac		1.38924	4167911	2872418	15770024	11041	22821394		14.201	28575548	15769702	2644928	48945	47039123
DBCC042B3	DBCC042B4	3		H4K16ac		1.2084	4304231	2969703	23033536	11791	30319261		9.12524	18574151	17145290	1430696	54929	37205066
DBCC042B5	DBCC042B6	3		H4K16ac		1.69295	4630546	4841080	14917194	12728	24401548		15.7514	32619307	33280581	1969646	112599	67982133
							#REF!
							#REF!
							#REF!
							#REF!
							#REF!
							#REF!
							#REF!
							#REF!
							#REF!
							#REF!
							#REF!
							#REF!
							#REF!
							#REF!
							#REF!
							#REF!
							#REF!
							#REF!
							#REF!
							#REF!
							#REF!
							#REF!
							#REF!
							#REF!
							#REF!
							#REF!
							#REF!
							#REF!
							#REF!
							#REF!
							#REF!
							#REF!
							#REF!
							#REF!
							#REF!
							#REF!
							#REF!
							#REF!
							#REF!
							#REF!
							#REF!
							#REF!
							#REF!
							#REF!
							#REF!
							#REF!
							#REF!
							#REF!
							#REF!
							#REF!
							#REF!
							#REF!
							#REF!
							#REF!
							#REF!
							#REF!
							#REF!
							#REF!
							#REF!
							#REF!
							#REF!
							#REF!
							#REF!
							#REF!
							#REF!
							#REF!
							#REF!
							#REF!
							#REF!
							#REF!
							#REF!
							#REF!
							#REF!
							#REF!
							#REF!
							#REF!
							#REF!
							#REF!
							#REF!
							#REF!
							#REF!
							#REF!
							#REF!
							#REF!
							#REF!
							#REF!
							#REF!
							#REF!
							#REF!
							#REF!
							#REF!
							#REF!
							#REF!
							#REF!
							#REF!
							#REF!
							#REF!
							#REF!
							#REF!
							#REF!
							#REF!
							#REF!
							#REF!
							#REF!
							#REF!
							#REF!
							#REF!
							#REF!
							#REF!
							#REF!
							#REF!
							#REF!
							#REF!
							#REF!
							#REF!
							#REF!
							#REF!
							#REF!
							#REF!
							#REF!
							#REF!
							#REF!
							#REF!
							#REF!
							#REF!
							#REF!
							#REF!
							#REF!
							#REF!
							#REF!
							#REF!
							#REF!
							#REF!
							#REF!
							#REF!
							#REF!
							#REF!
							#REF!
							#REF!
							#REF!
							#REF!
							#REF!
							#REF!
							#REF!
							#REF!
							#REF!
							#REF!
							#REF!
							#REF!
							#REF!
							#REF!
							#REF!
							#REF!
							#REF!
							#REF!
							#REF!
							#REF!
							#REF!
							#REF!
							#REF!
							#REF!
							#REF!
							#REF!
							#REF!
							#REF!
							#REF!
							#REF!
							#REF!
							#REF!
							#REF!
							#REF!
							#REF!
							#REF!
							#REF!
							#REF!
							#REF!
							#REF!
							#REF!
							#REF!
							#REF!
							#REF!
							#REF!
							#REF!
							#REF!
							#REF!
							#REF!
							#REF!
							#REF!
							#REF!
							#REF!
							#REF!
							#REF!
							#REF!
							#REF!
							#REF!
							#REF!
							#REF!
							#REF!
							#REF!
							#REF!
							#REF!
							#REF!
							#REF!
							#REF!
							#REF!
							#REF!
							#REF!
							#REF!
							#REF!
							#REF!
							#REF!
							#REF!
							#REF!
							#REF!
							#REF!
							#REF!
							#REF!
							#REF!
							#REF!
							#REF!
							#REF!
							#REF!
							#REF!
							#REF!
							#REF!
							#REF!
