# Supplementary material for: Establishment of H3K9me3-dependent heterochromatin during embryogenesis in Drosophila miranda
Source: eLife. 2021 Jun 15;10:e55612. doi: 10.7554/eLife.55612 (PMC8285105; doi:10.7554/eLife.55612)
Supplement: Supplementary file 2. [file elife-55612-supp2.xlsx]

## Sheet: Sheet1
Supplementary file 2. Embryonic RNA-seq sample information and mapping statistics
Sample	Sex	Stage	replicate	No. of reads
				TE	Genic	Total Mapped	Total
Dmir.female.stage2.0.replicate1	female	stage2	replicate1	120991	22929051	32092442	32841822
Dmir.female.stage2.0.replicate2	female	stage2	replicate2	82469	15687592	21401101	21865140
Dmir.female.stage2.0.replicate3	female	stage2	replicate3	181955	34977119	48392657	49800534
Dmir.female.stage4.0.replicate1	female	stage4	replicate1	107402	17156703	24683455	25407901
Dmir.female.stage4.0.replicate2	female	stage4	replicate2	161640	25645534	37091377	38127261
Dmir.female.stage4.0.replicate3	female	stage4	replicate3	128173	21041915	32528762	33350890
Dmir.female.stage5.5.replicate1	female	stage5.5	replicate1	256883	23181469	35025260	35877383
Dmir.female.stage5.5.replicate3	female	stage5.5	replicate3	275713	24166389	36966678	38621442
Dmir.female.stage5.9.replicate1	female	stage5.9	replicate1	225422	19689055	30326568	31452633
Dmir.female.stage5.9.replicate2	female	stage5.9	replicate2	284748	25585408	39946394	41326639
Dmir.female.stage5.9.replicate3	female	stage5.9	replicate3	280531	23665450	33514465	34514880
Dmir.female.stage7.0.replicate1	female	stage7	replicate1	141364	11143560	16629771	17028358
Dmir.female.stage7.0.replicate2	female	stage7	replicate2	357106	29590490	46540767	47964612
Dmir.female.stage8.9.replicate1	female	stage8	replicate1	294800	20805189	32068727	33054997
Dmir.female.stage8.9.replicate2	female	stage8	replicate2	373575	24225884	36027480	37324208
Dmir.female.stage8.9.replicate3	female	stage8	replicate3	252073	19509826	29268192	29983048
Dmir.female.stage10.0.replicate1	female	stage10	replicate1	397946	24774725	37118672	38082263
Dmir.female.stage10.0.replicate2	female	stage10	replicate2	751984	17149863	26557219	27167908
Dmir.female.stage12.0.replicate1	female	stage12	replicate1	298101	25379141	47656181	49157046
Dmir.female.stage12.0.replicate3	female	stage12	replicate3	230595	19335479	28842889	29581325
Dmir.male.stage2.0.replicate1	male	stage2	replicate1	134357	26696004	38166005	39169700
Dmir.male.stage2.0.replicate2	male	stage2	replicate2	129652	24104875	33426711	34133590
Dmir.male.stage2.0.replicate3	male	stage2	replicate3	108972	20774385	28800958	29606897
Dmir.male.stage4.0.replicate1	male	stage4	replicate1	132889	21778732	31250945	32110507
Dmir.male.stage4.0.replicate2	male	stage4	replicate2	158466	23215842	34404625	35294615
Dmir.male.stage4.0.replicate3	male	stage4	replicate3	110649	15787991	22504483	23071844
Dmir.male.stage5.5.replicate1	male	stage5.5	replicate1	300477	17205448	26154874	26802291
Dmir.male.stage5.5.replicate2	male	stage5.5	replicate2	365261	20115265	32927278	33813765
Dmir.male.stage5.5.replicate3	male	stage5.5	replicate3	397640	23919386	38618973	40343050
Dmir.male.stage5.9.replicate1	male	stage5.9	replicate1	458816	19388161	31142308	32087272
Dmir.male.stage5.9.replicate2	male	stage5.9	replicate2	639083	23367975	37043583	38278316
Dmir.male.stage5.9.replicate3	male	stage5.9	replicate3	534051	32126738	64234556	66210151
Dmir.male.stage7.0.replicate1	male	stage7	replicate1	472605	20032130	30355402	31113497
Dmir.male.stage7.0.replicate2	male	stage7	replicate2	741295	15026060	22732107	23200301
Dmir.male.stage7.0.replicate3	male	stage7	replicate3	736570	21902676	34618472	35600438
Dmir.male.stage8.9.replicate1	male	stage8	replicate1	485695	15145731	23188831	23764995
Dmir.male.stage8.9.replicate2	male	stage8	replicate2	706864	23599885	39486015	40847022
Dmir.male.stage10.0.replicate1	male	stage10	replicate1	600966	16827319	27485464	28170523
Dmir.male.stage10.0.replicate2	male	stage10	replicate2	758977	20158789	34716762	35710580
Dmir.male.stage10.0.replicate3	male	stage10	replicate3	808849	23345940	37889057	39229640
Dmir.male.stage12.0.replicate1	male	stage12	replicate1	583220	20599419	34049544	36061017
Dmir.male.stage12.0.replicate2	male	stage12	replicate2	802393	21476047	34941493	36067282
Dmir.male.stage12.0.replicate3	male	stage12	replicate3	406777	16535737	25495647	26100825
