# Supplementary material for: Establishment of H3K9me3-dependent heterochromatin during embryogenesis in Drosophila miranda
Source: eLife. 2021 Jun 15;10:e55612. doi: 10.7554/eLife.55612 (PMC8285105; doi:10.7554/eLife.55612)
Supplement: Supplementary file 3. [file elife-55612-supp3.xlsx]

## Sheet: Sheet1
Supplementary file 3. piRNA sequencing mapping statistics
Sample name	Mapped to genome			Mapped to TE library			Total number of reads
	23-29bp	Total mapped		23-29bp		Total mapped
				Sense	Antisense
Dmir_01hremb_piRNA.fq	9329102	10474822		995896	8001711	9890272	21158043
