# Supplementary material for: Establishment of H3K9me3-dependent heterochromatin during embryogenesis in Drosophila miranda
Source: eLife. 2021 Jun 15;10:e55612. doi: 10.7554/eLife.55612 (PMC8285105; doi:10.7554/eLife.55612)
Supplement: Supplementary file 4. [file elife-55612-supp4.xlsx]

## Sheet: Sheet1
Supplementary file 4. ATAC-seq sample information and mapping statistics
Sample info				Mappint statistics
Library ID	Stage	Sex		Auto. coverage	Mapped reads	Total
DBKW018A1	3	M		7.63148	48807723	48867710
DBKW018A2	3	M		16.8978	55403837	55469626
DBKW018A3	3	M		20.7978	67640939	67721608
DBKW018A5	3	M		13.6401	53033915	53109442
DBKW018A6	3	M		17.8543	57574350	57662995
DBKW018A7	3	M		9.97612	53201993	53710251
DBKW018A8	3	F		19.5287	61684516	61786042
DBKW018B1	4early	F		22.0843	59513446	59641109
DBKW018B2	4early	M		20.7368	61163884	61325763
DBKW018B5	4early	M		9.4988	29396309	29526956
DBKW018B6	4early	M		17.2176	64627154	65030258
DBKW018C1	4late	M		18.036	56942522	57539191
DBKW018C2	4late	M		19.5221	53255023	53370198
DBKW018C3	4late	M		20.1349	56613574	56695679
DBKW018C5	4late	M		19.8275	56766712	56851683
DBKW018C6	4late	F		19.9824	53627232	53697876
DBKW018D1	5	M		26.5431	68135412	68307615
DBKW018D2	5	M		12.4916	28658794	28805321
DBKW018D3	5	M		27.782	70955440	71688666
DBKW018D4	5	F		26.2862	69236623	69419672
Dmir_female_MSH22_gDNAseq_WT_whole_1	DNA	F		7.34675	18253216	20214254
Dmir_male_MSH22_gDNAseq_WT_whole_1	DNA	M		7.29919	19112545	22081145
					#REF!
					#REF!
					#REF!
					#REF!
					#REF!
					#REF!
					#REF!
					#REF!
					#REF!
					#REF!
					#REF!
					#REF!
					#REF!
					#REF!
					#REF!
					#REF!
					#REF!
					#REF!
					#REF!
					#REF!
					#REF!
					#REF!
					#REF!
					#REF!
					#REF!
					#REF!
					#REF!
					#REF!
					#REF!
					#REF!
					#REF!
					#REF!
					#REF!
					#REF!
					#REF!
					#REF!
					#REF!
					#REF!
					#REF!
					#REF!
					#REF!
					#REF!
					#REF!
					#REF!
					#REF!
					#REF!
					#REF!
					#REF!
					#REF!
					#REF!
					#REF!
					#REF!
					#REF!
					#REF!
					#REF!
					#REF!
					#REF!
					#REF!
					#REF!
					#REF!
					#REF!
					#REF!
					#REF!
					#REF!
					#REF!
					#REF!
					#REF!
					#REF!
					#REF!
					#REF!
					#REF!
					#REF!
					#REF!
					#REF!
					#REF!
					#REF!
					#REF!
					#REF!
					#REF!
					#REF!
					#REF!
					#REF!
					#REF!
					#REF!
					#REF!
					#REF!
					#REF!
					#REF!
					#REF!
					#REF!
					#REF!
					#REF!
					#REF!
					#REF!
					#REF!
					#REF!
					#REF!
					#REF!
					#REF!
					#REF!
					#REF!
					#REF!
					#REF!
					#REF!
					#REF!
					#REF!
					#REF!
					#REF!
					#REF!
					#REF!
					#REF!
					#REF!
					#REF!
					#REF!
					#REF!
					#REF!
					#REF!
					#REF!
					#REF!
					#REF!
					#REF!
					#REF!
					#REF!
					#REF!
					#REF!
					#REF!
					#REF!
					#REF!
					#REF!
					#REF!
					#REF!
					#REF!
					#REF!
					#REF!
					#REF!
					#REF!
					#REF!
					#REF!
					#REF!
					#REF!
					#REF!
					#REF!
					#REF!
					#REF!
					#REF!
					#REF!
					#REF!
					#REF!
					#REF!
					#REF!
					#REF!
					#REF!
					#REF!
					#REF!
					#REF!
					#REF!
					#REF!
					#REF!
					#REF!
					#REF!
					#REF!
					#REF!
					#REF!
					#REF!
					#REF!
					#REF!
					#REF!
					#REF!
					#REF!
					#REF!
					#REF!
					#REF!
					#REF!
					#REF!
					#REF!
					#REF!
					#REF!
					#REF!
					#REF!
					#REF!
					#REF!
					#REF!
					#REF!
					#REF!
					#REF!
					#REF!
					#REF!
					#REF!
					#REF!
					#REF!
					#REF!
					#REF!
					#REF!
					#REF!
					#REF!
					#REF!
					#REF!
					#REF!
					#REF!
					#REF!
					#REF!
					#REF!
					#REF!
					#REF!
					#REF!
					#REF!
					#REF!
					#REF!
					#REF!
					#REF!
					#REF!
					#REF!
					#REF!
					#REF!
					#REF!
					#REF!
					#REF!
					#REF!
					#REF!
					#REF!
					#REF!
					#REF!
					#REF!
					#REF!
					#REF!
					#REF!
